# Supplementary material for: Enhanced nucleotide mismatch detection based on a 3D silicon nanowire microarray
Source: Royal Society of Chemistry journal article supplement (doi:10.1039/c5ra14442f), 2015-01-01
Supplement: c5ra14442f1.pdf [file c5ra14442f1.pdf]

## Supplementary Information

### Mismatch detection enhancement based on silicon nanowires 3D microarray

*Melania Banu<sup>1</sup>, Monica Simion<sup>1</sup>, Attila Ratiu<sup>2</sup>, Marian Popescu<sup>1</sup>, Cosmin Romanitan<sup>1</sup>, Mihai Danila<sup>1</sup>,  
Antonio Radoi<sup>1</sup>, Alexandru Ecovoiu<sup>2</sup>, Mihaela Kusko<sup>1</sup>*

<sup>1</sup> National Institute for Research and Development in Microtechnologies – IMT Bucharest, 126A Erou Iancu  
Nicolae Street, 077190 Bucharest, Romania

<sup>2</sup> Institute of Genetics, University of Bucharest, 1-3 Portocalelor Alley, 060101 Bucharest, Romania

**Figure S1: Hairpin formation probability**

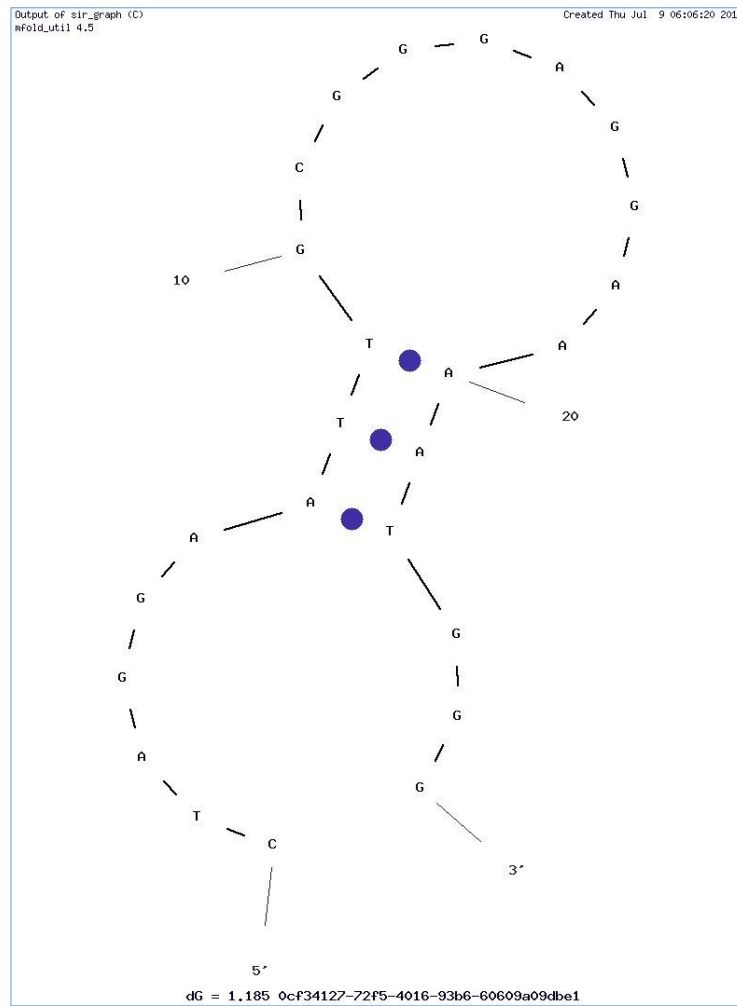

$$\Delta G = 1.18 \text{ kcal/mole}$$

$$\Delta H = -16.2 \text{ kcal/mole}$$

$$\Delta S = -58.31 \text{ cal/ K * mole}$$

**Table S1: Self-dimer formation probability**

|                                               |                           |
|-----------------------------------------------|---------------------------|
| <b>Probe Sequence</b>                         |                           |
| 5'- CCCATTTTCCTCCCGCAATTCCTAG -3'             |                           |
| Maximum Delta G: -52.23 kcal/mole             |                           |
| <b>Delta G: -5.36 kcal/mole Base Pairs: 4</b> |                           |
| 5'                                            | CTAGGAATTGCGGGAGGAAAATGGG |
|                                               | : :      : :              |
| 3'                                            | GGGTAAAAGGAGGGCGTTAAGGATC |
| <b>Delta G: -4.16 kcal/mole Base Pairs: 4</b> |                           |
| 5'                                            | CCCATTTTCCTCCCGCAATTCCTAG |
|                                               |                           |
| 3'                                            | GATCCTTAACGCCCTCCTTTTACCC |
| <b>Delta G: -3.61 kcal/mole Base Pairs: 2</b> |                           |
| 5'                                            | CCCATTTTCCTCCCGCAATTCCTAG |
|                                               | : :    : :                |
| 3'                                            | GATCCTTAACGCCCTCCTTTTACCC |
| <b>Delta G: -3.42 kcal/mole Base Pairs: 3</b> |                           |
| 5'                                            | CCCATTTTCCTCCCGCAATTCCTAG |
|                                               | :::                       |
| 3'                                            | GATCCTTAACGCCCTCCTTTTACCC |
| <b>Delta G: -3.14 kcal/mole Base Pairs: 2</b> |                           |
| 5'                                            | CCCATTTTCCTCCCGCAATTCCTAG |
|                                               | :    :                    |
| 3'                                            | GATCCTTAACGCCCTCCTTTTACCC |

Figure S2: Comparison of the microarray scanned images obtained on 2D (a) and 3D (b) platforms, respectively

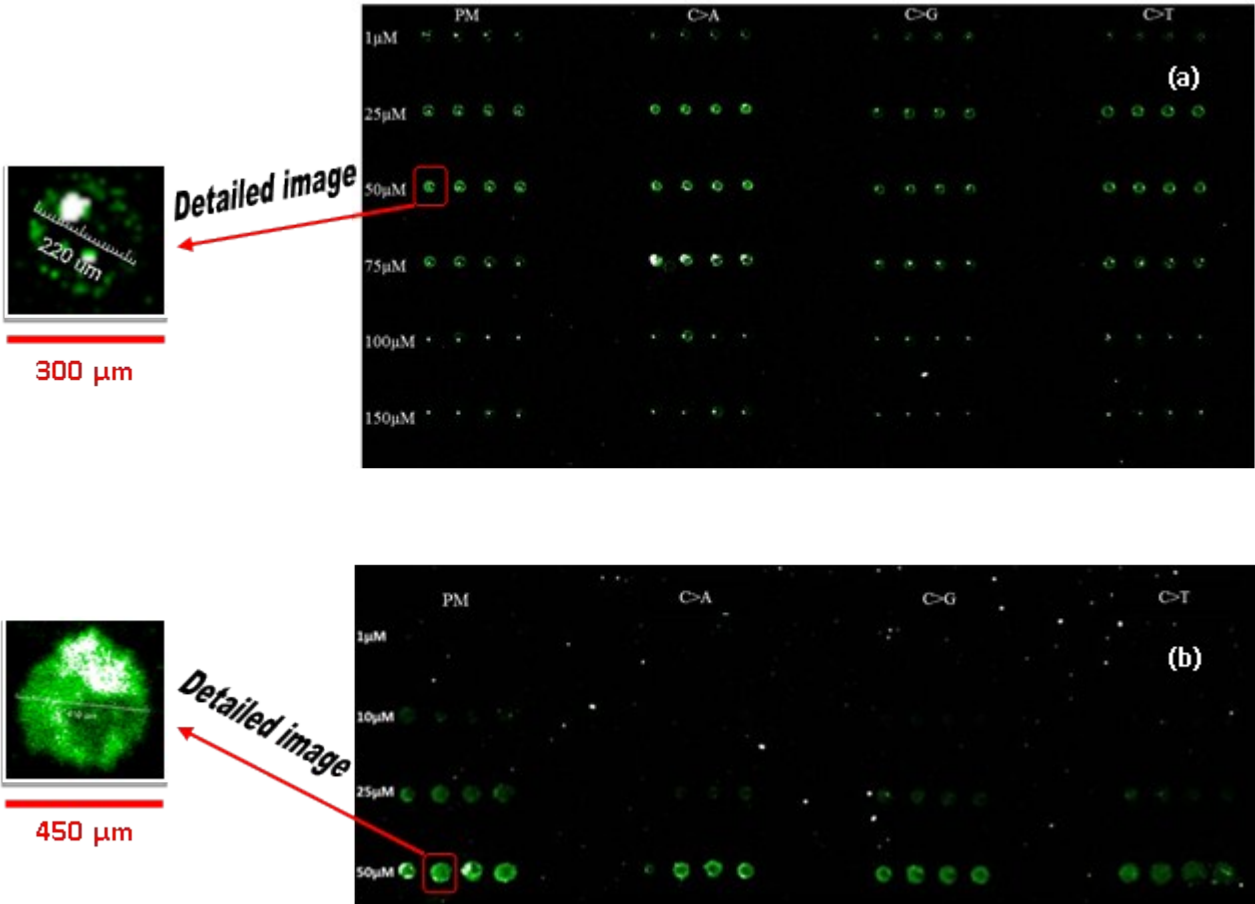

**Table S2: The hybridization thermodynamics calculated for the selected sequences, with IDT Biophysics software**

| <b>Sequences</b> | <b><math>\Delta G_{37}</math></b><br>[kcal/mole] | <b><math>\Delta H</math></b><br>[kcal/mole] | <b><math>\Delta S</math></b><br>[cal/(K·mole)] |
|------------------|--------------------------------------------------|---------------------------------------------|------------------------------------------------|
| <b>Normal</b>    | -14.78                                           | -194.30                                     | -578.82                                        |
| <b>C&gt;A</b>    | -11.73                                           | -178.50                                     | -537.72                                        |
| <b>C&gt;G</b>    | -12.46                                           | -184.80                                     | -555.67                                        |
| <b>C&gt;T</b>    | -12.24                                           | -182.40                                     | -548.62                                        |
